# Supplementary material for: Improve iLOVECLIM (version 1.1) with a multi-layer snow model: surface mass balance evolution during the Last Interglacial
Source: Copernicus journal article supplement (doi:10.5194/egusphere-2024-556), 2024-03-18
Supplement: Supplementary file 1 [file egusphere-2024-556-supplement.pdf]

## Supplement of

# Improve *i*LOVECLIM (version 1.1) with a multi-layer snow model: surface mass balance evolution during the Last Interglacial

Thi-Khanh-Dieu Hoang<sup>1</sup>, Aurélien Quiquet<sup>1</sup>, Christophe Dumas<sup>1</sup>, Andreas Born<sup>2</sup>, and Didier M. Roche<sup>1,3</sup>

<sup>1</sup>Laboratoire des Sciences du Climat et de l'Environnement, LSCE/IPSL, CEA-CNRS-UVSQ, Université Paris-Saclay, 91191 Gif-sur-Yvette, France

<sup>2</sup>Department of Earth Sciences, University of Bergen and Bjerknes Centre for Climate Research, Bergen, Norway

<sup>3</sup>Department of Earth Sciences, Faculty of Science, Vrije Universiteit Amsterdam, Amsterdam, the Netherlands

**Correspondence:** Thi-Khanh-Dieu Hoang (dieu.hoang@lsce.ipsl.fr)

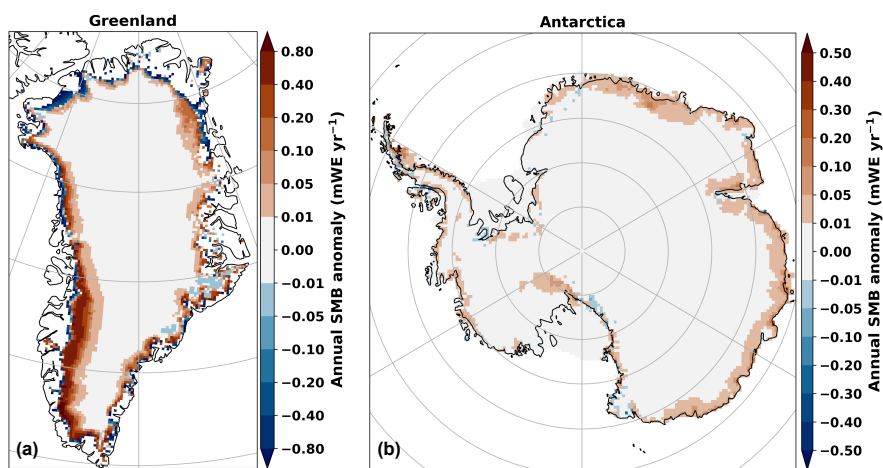

**Figure S1.** Annual mean SMB anomalies (in  $\text{mWE yr}^{-1}$ ) of BESSI with respect to MAR during the period 1979-2021 for (a) Greenland and (b) Antarctica.

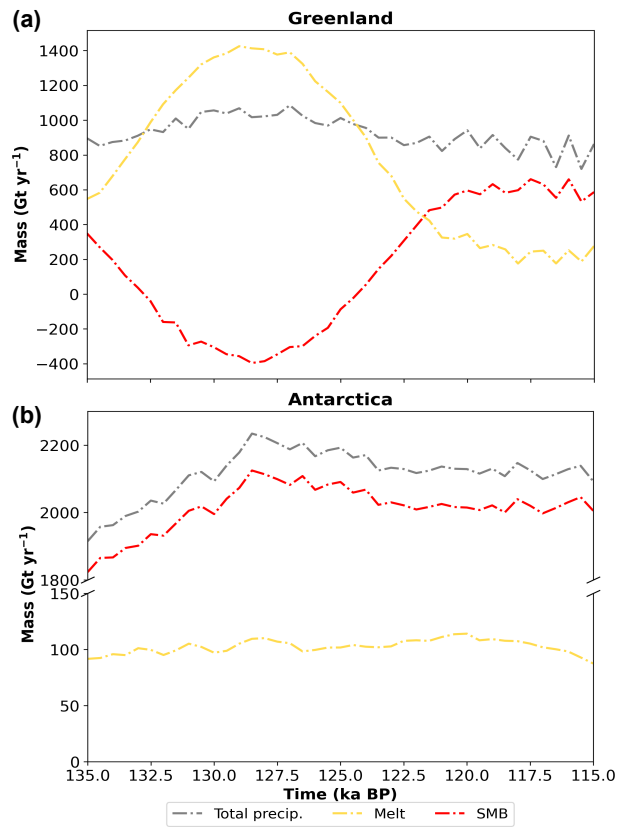

**Figure S2.** Temporal variation of the annual mean total SMB and its elements integrated on the present-day ice sheet extent of ITM (in Gt yr<sup>-1</sup>) during LIG for **(a)** Greenland and **(b)** Antarctica.

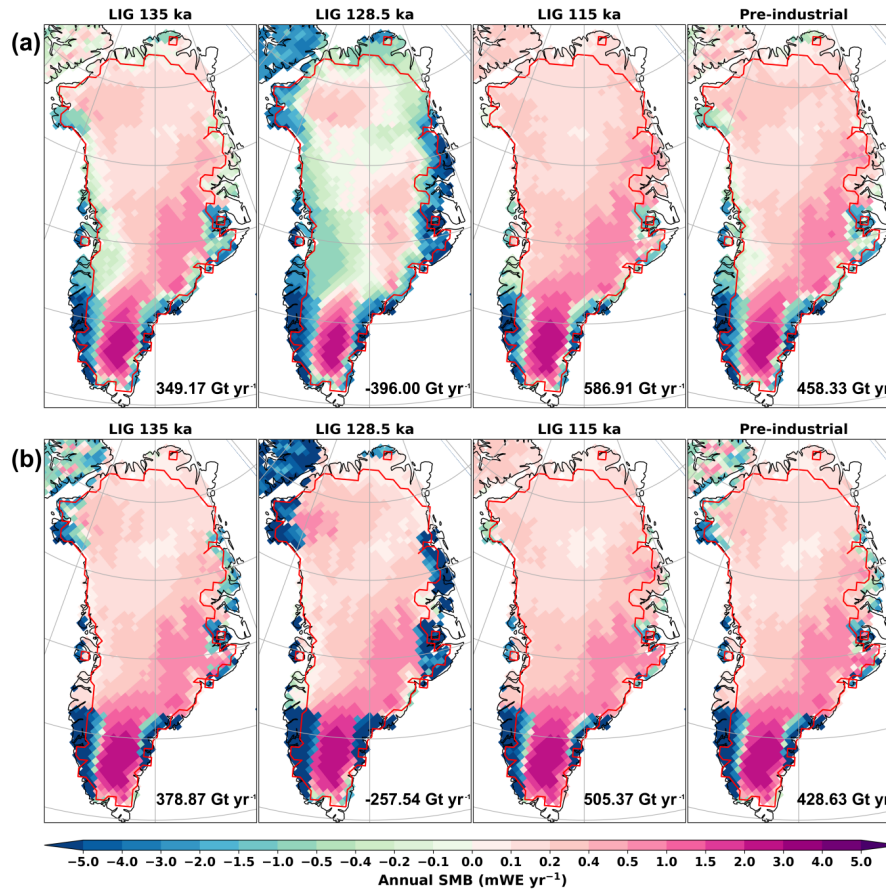

**Figure S3.** Annual mean SMB (in Gt yr<sup>-1</sup>) of some LIG time slices (135, 128.5 and 115 kaBP) and the pre-industrial simulation of (a) ITM and (b) BESSI-*i*LOVECLIM for Greenland Ice Sheet. The total SMB (in Gt yr<sup>-1</sup>) integrated for the present-day ice sheet extent (red line) is also included.

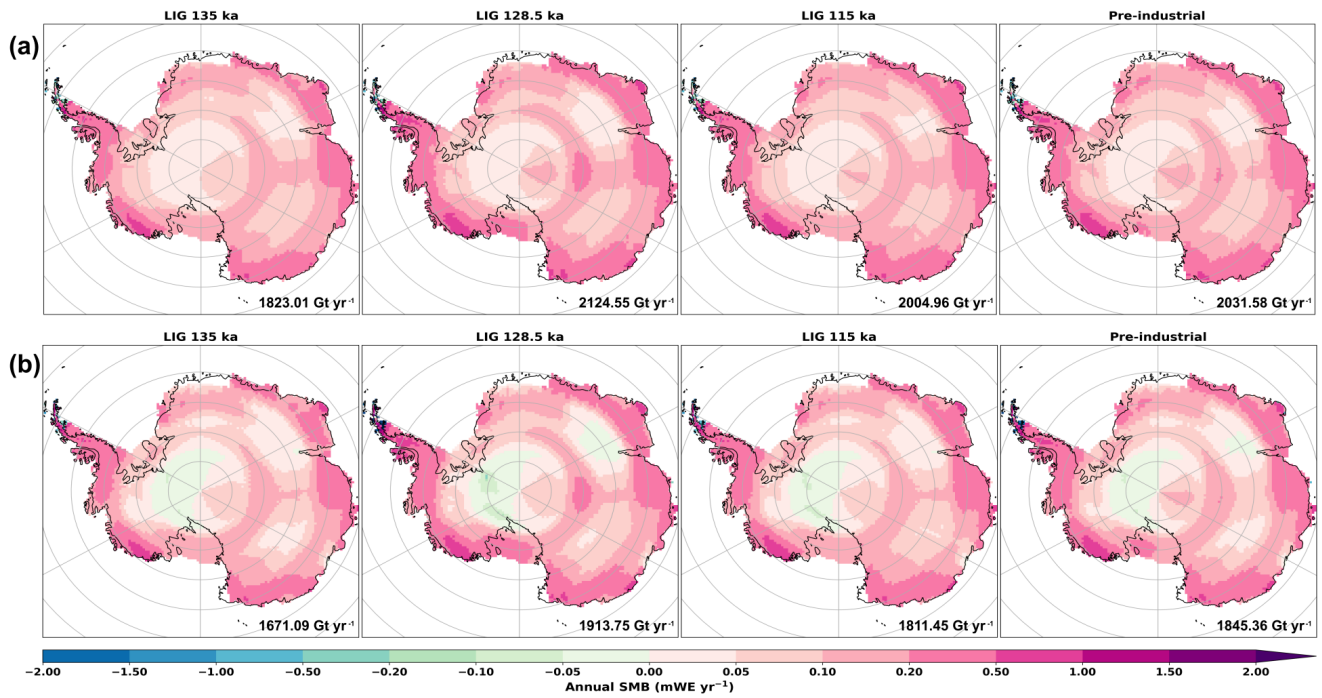

**Figure S4.** Annual mean SMB (in Gt yr<sup>-1</sup>) of some LIG time slices (135, 128.5 and 115 kaBP) and the pre-industrial simulation of (a) ITM and (b) BESSI-iLOVECLIM for Antarctic Ice Sheet. The total SMB (in Gt yr<sup>-1</sup>) integrated for the present-day ice sheet extent is also included.

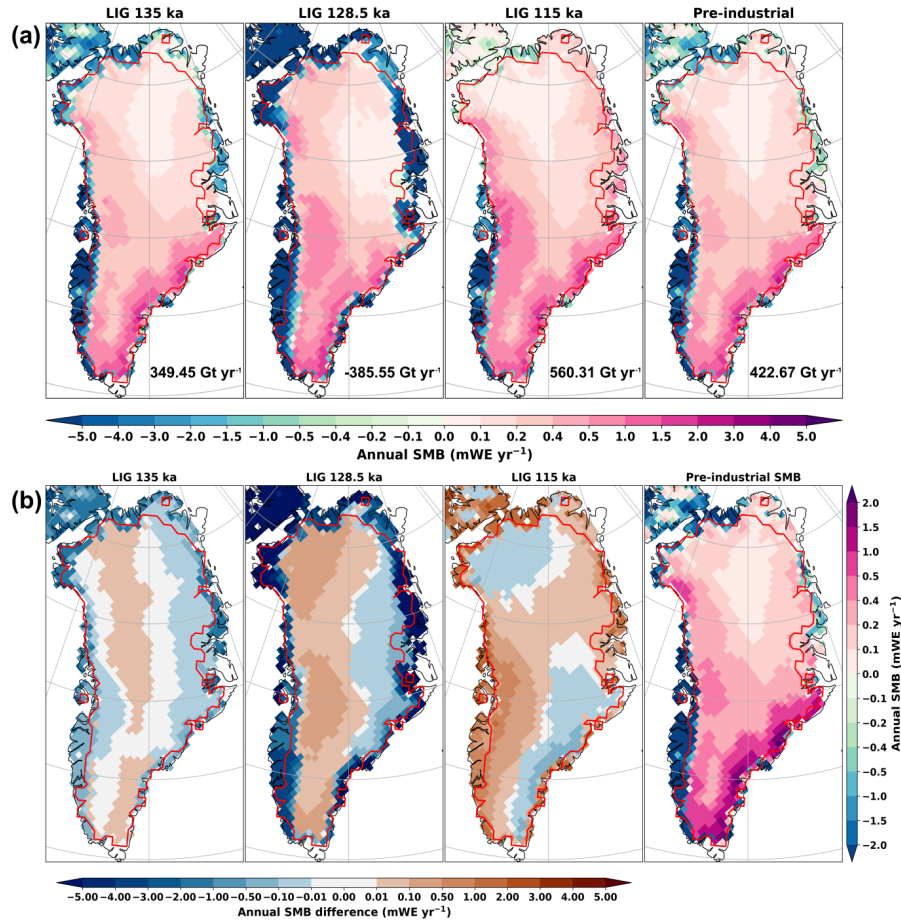

**Figure S5.** (a) Annual mean SMB (in  $\text{Gt yr}^{-1}$ ) of some LIG time slices (135, 128.5 and 115 kaBP) and the pre-industrial simulation of bias-corrected BESSI-*i*LOVECLIM, including the total SMB (in  $\text{Gt yr}^{-1}$ ) integrated for the present-day ice sheet extent (red line). (b) Annual mean SMB anomalies (in  $\text{Gt yr}^{-1}$ ) between several LIG time slices (135, 128.5 and 115 kaBP) and the pre-industrial of bias-corrected BESSI-*i*LOVECLIM for Greenland Ice Sheet.
